# Supplementary material
Source: Springer Nature journal article supplement (https://www.springermedizin.de/resource/supplementary/12936_2009_962_MOESM3_ESM.pdf/9548638)
Supplement: MOESM3 [file 9548638]

(b) Local disruption of flow forces creates shear force 'shadow'

Endothelial cell monolayer

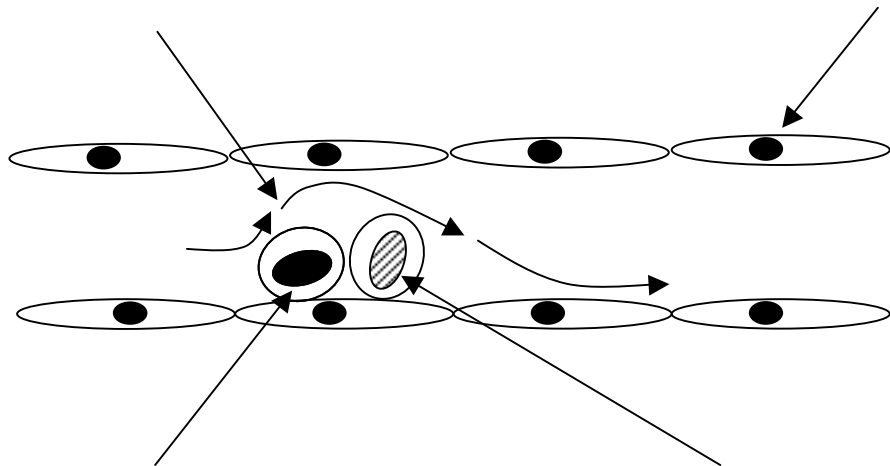

(a) Initial tethering event by A4-like pRBC

(c) pRBC with reduced ability to bind from flow are now able to adhere more efficiently to endothelium
